# Supplementary material for: Experimental Evidence of Large Amplitude pH Mediated Autonomous Chemomechanical Oscillation
Source: MDPI journal article supplement (doi:10.3390/polym9110554), 2017-10-25
Supplement: s1 [file s1]

Experimental evidence of large amplitude pH mediated autonomous chemomechanical  
oscillation

Xin Yang <sup>1</sup>, Yi Zhou, <sup>1, 2 †</sup> Lin Ji<sup>1,\*</sup> Yanhui Ding <sup>1</sup>, and Jianquan Wang <sup>2,\*</sup> Xin Liang<sup>3</sup>

### **Supporting Information**

Video of the oscillating gel.

Video legend: The video of oscillating gel in the porous P(AA-*co*-AM) hydrogel  
and BSM pH oscillatory reaction coupled system, with the corresponding quantitative  
data shown in Fig 1.
